# Supplementary material for: Aldol condensation of refluxing acetone on CaC2 achieves efficient coproduction of diacetone alcohol, mesityl oxide and isophorone
Source: Royal Society of Chemistry journal article supplement (doi:10.1039/c8ra05965a), 2018-01-01
Supplement: c8ra05965a1.pdf [file c8ra05965a1.pdf]

## Aldol condensation of refluxing acetone on $\text{CaC}_2$ achieves efficient coproduction of diacetone-alcohol, mesityl oxide and isophorone

Xuebing Xu<sup>a,b</sup>, Hong Meng<sup>b</sup>, Yingzhou Lu<sup>b</sup>, Chunxi Li<sup>a,b,c,\*</sup>

<sup>a</sup> State Key Laboratory of Chemical Resource Engineering; <sup>b</sup> College of Chemical Engineering, <sup>c</sup> Beijing Key Laboratory of Energy Environmental Catalysis, Beijing University of Chemical Technology, Beijing 100029, PR China; Tel/Fax: 86-10-64410308; E-mail:

Licx@mail.buct.edu.cn

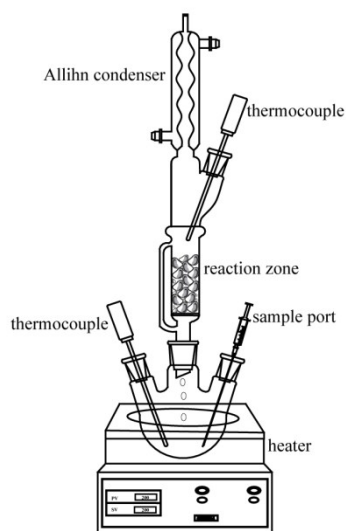

Fig.S1 Refluxing reaction experimental setup

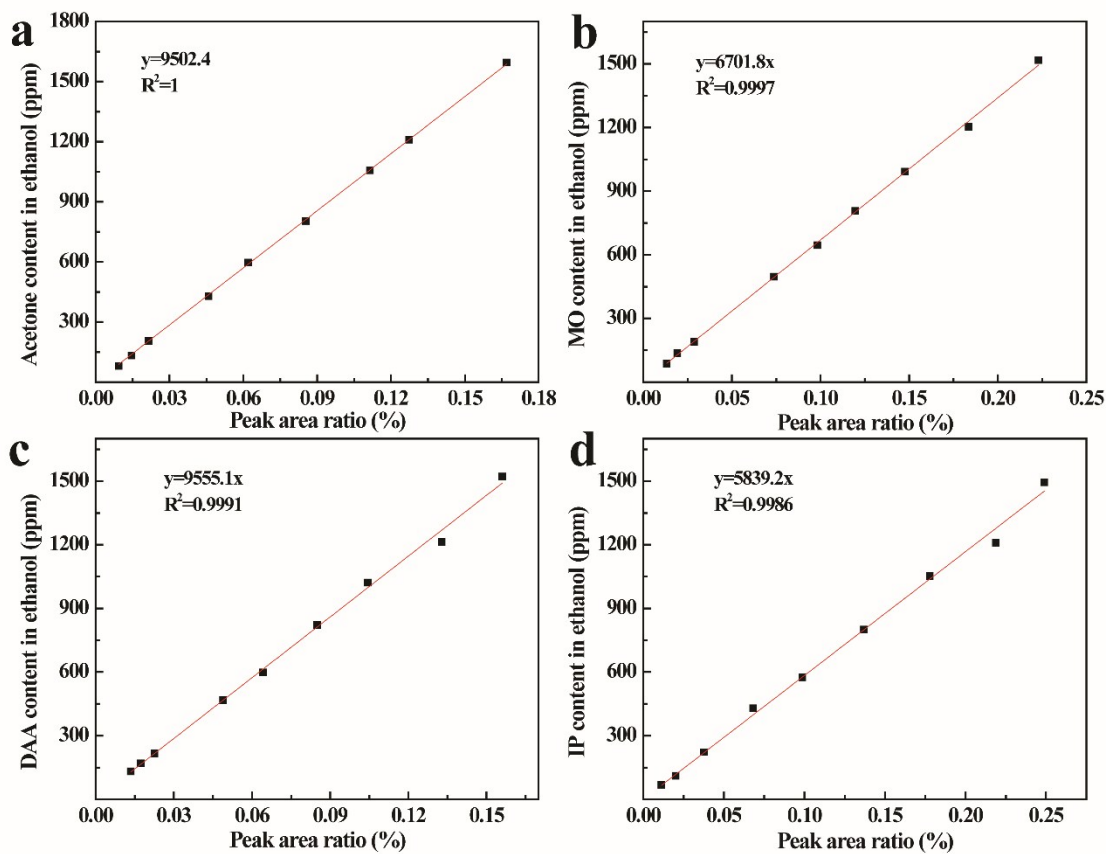

Fig.S2 Standard curve of acetone-ethanol (a), MO-ethanol (b), DAA-ethanol (c) and IP-ethanol (d)

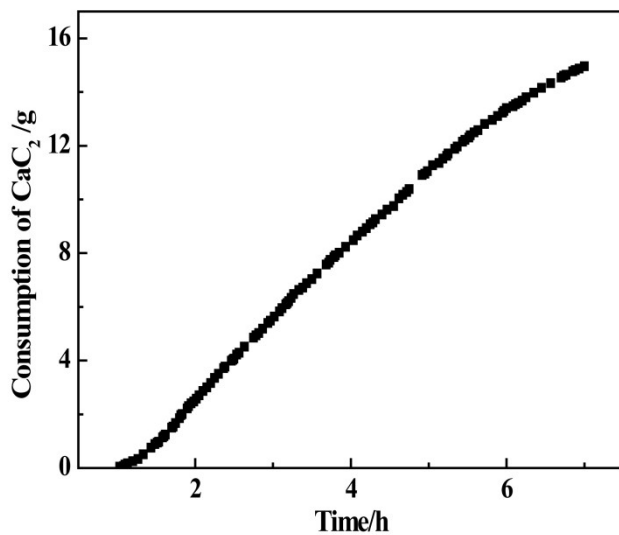

Fig.S3 Consumption of  $\text{CaC}_2$  at the boiling point of acetone

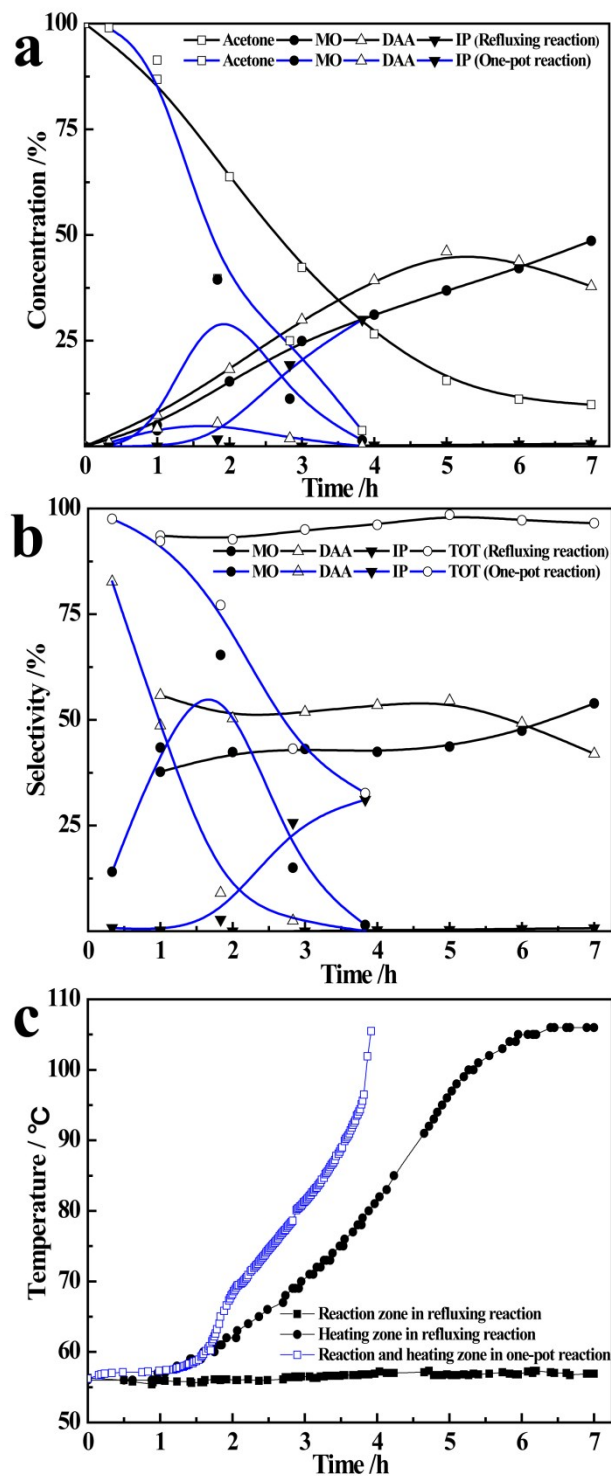

Fig. S4 Variation of liquid concentration (a), selectivity (b) and temperature (c) with time at two reaction processes
